# Supplementary material for: Lacosamide adjunctive therapy for partial-onset seizures: a meta-analysis
Source: PubMed Central journal article supplement (PMC3740140; doi:10.7717/peerj.114), 2013-08-06

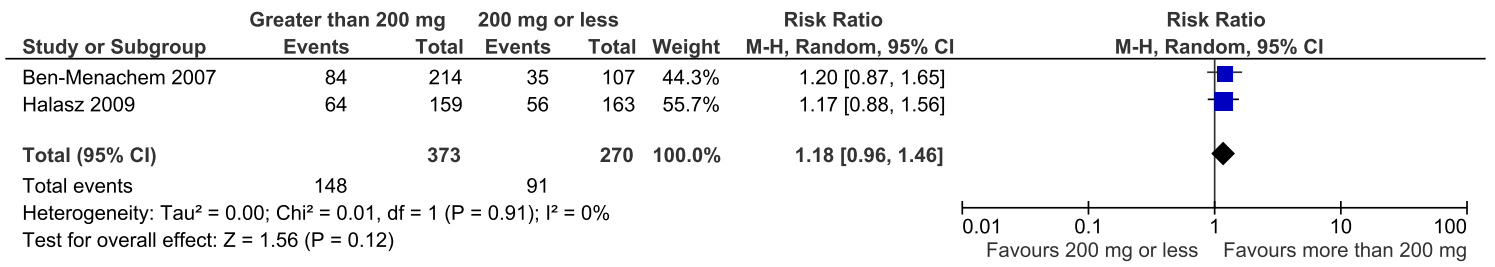

Supplement: peerj-01-114-s009.pdf [file peerj-01-114-s009.pdf]
