# Supplementary material for: Lacosamide adjunctive therapy for partial-onset seizures: a meta-analysis
Source: PeerJ journal article supplement (doi:10.7717/peerj.114), 2013-08-06

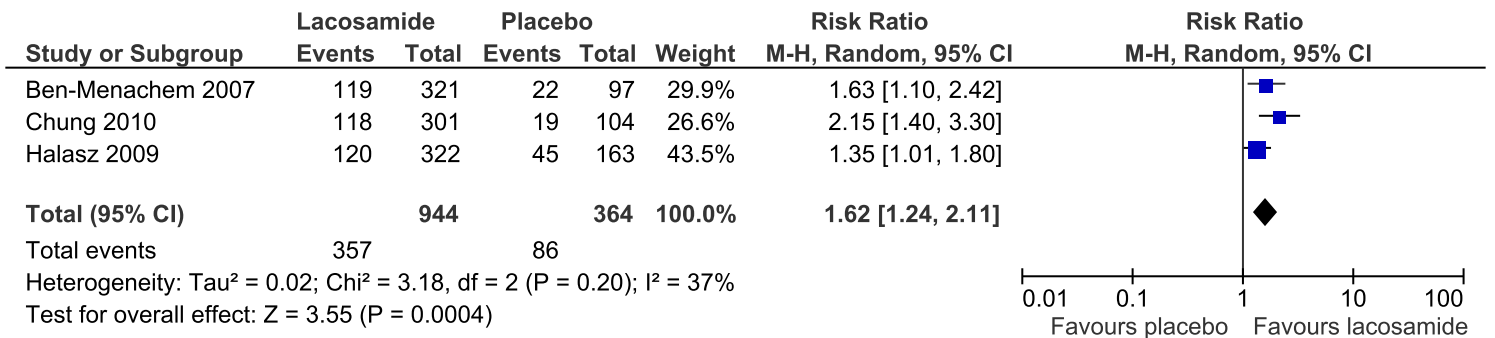

Supplement: Supplemental_Figure_S5.pdf [file Supplemental_Figure_S5.pdf]
